# Supplementary material for: Highly selective hydrodeoxygenation of anisole, phenol and guaiacol to benzene over nickel phosphide
Source: Royal Society of Chemistry journal article supplement (doi:10.1039/c7ra00989e), 2017-01-01
Supplement: c7ra00989e1.pdf [file c7ra00989e1.pdf]

# Supporting information

## Highly selective hydrodeoxygenation of anisole, phenol and guaiacol to benzene over nickel phosphide

Yunhua Li\*, Juan Fu, Binghui Chen

Department of Chemical and Biochemical Engineering, College of Chemistry and Chemical Engineering,  
National Engineering Laboratory for Green Chemical Productions of Alcohols-Ethers-Esters, Xiamen  
University, Xiamen, 361005, PR China

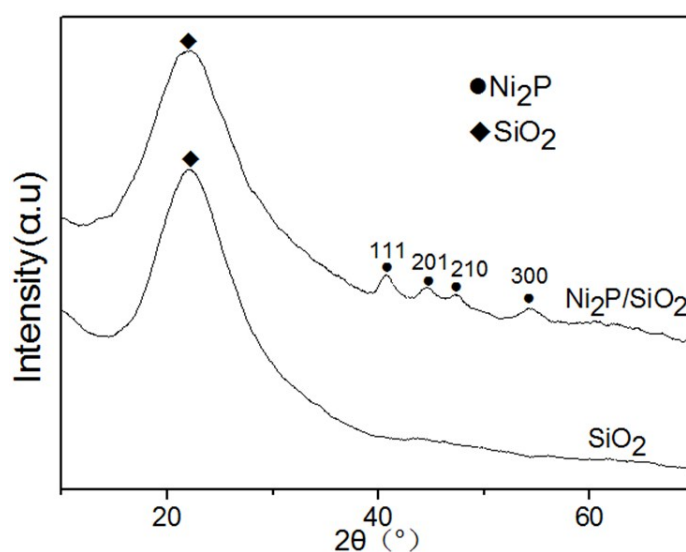

Fig. S1 X-ray diffraction patterns of the  $\text{Ni}_2\text{P}$  catalyst

Table S1 Composition and physical properties of the  $\text{Ni}_2\text{P}$  supported catalyst

| Catalyst              | Content <sup>a</sup> | $S_{\text{BET}}(\text{m}^2/\text{g})^b$ | $d(\text{nm})^b$ | $V_{\text{total}}(\text{cm}^3/\text{g})^b$ |
|-----------------------|----------------------|-----------------------------------------|------------------|--------------------------------------------|
| $\text{Ni}_2\text{P}$ | 7.5                  | 316                                     | 8.7              | 0.7                                        |

<sup>a</sup>. The result is derived from XRF

<sup>b</sup>. Data are from BET  $\text{N}_2$  adsorption

\* Corresponding author. Tel./fax: +86 0592 2183751. E-mail addresses: yunhuali@xmu.edu.cn (Y. Li),

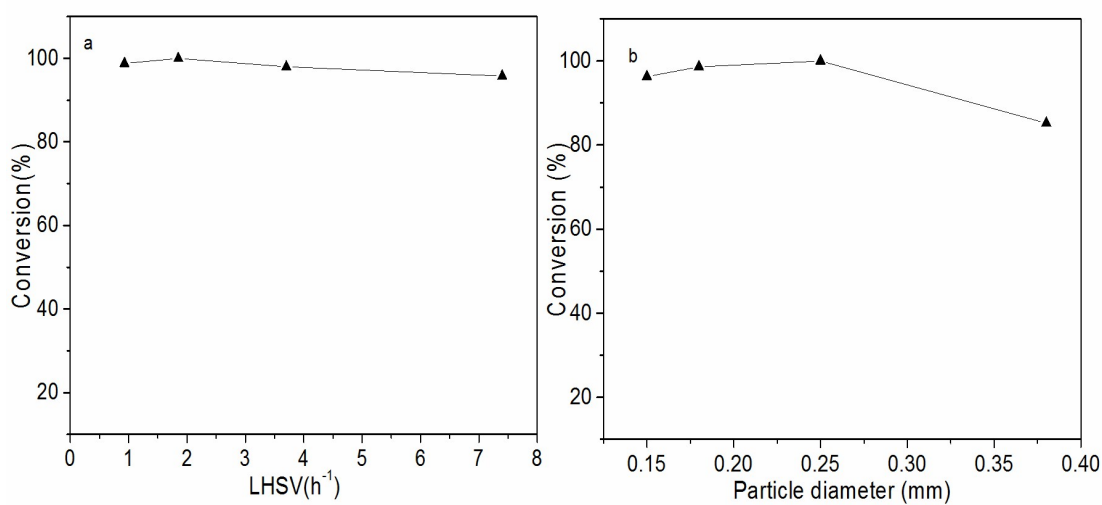

Fig. S2 Variation of the conversion with (a) LHSV and (b) particle size

(a) Reaction condition: 673 K , 0.5 MPa, particle diameter 0.18 mm,  $\text{H}_2$ /anisole mole ratio 45

(b) Reaction condition: 673 K , 0.5 MPa, LHSV  $1.85 \text{ h}^{-1}$ ,  $\text{H}_2$ /anisole mole ratio 45

Table S2 Element analysis of before and after the reaction

| Reactant | Reaction<br>time(h) | Before reaction (Wt.%) |     |     | After reaction (Wt.%) |     |     |
|----------|---------------------|------------------------|-----|-----|-----------------------|-----|-----|
|          |                     | C                      | H   | N   | C                     | H   | N   |
| guaiacol | 6                   | 0.0                    | 0.7 | 0.0 | 4.6                   | 0.7 | 0.0 |
| anisole  | 36                  | 0.0                    | 0.7 | 0.0 | 0.0                   | 0.6 | 0.0 |
